# Supplementary material
Source: Springer Nature journal article supplement (https://www.springermedizin.de/resource/supplementary/13041_2013_229_MOESM3_ESM.pdf/25657778)

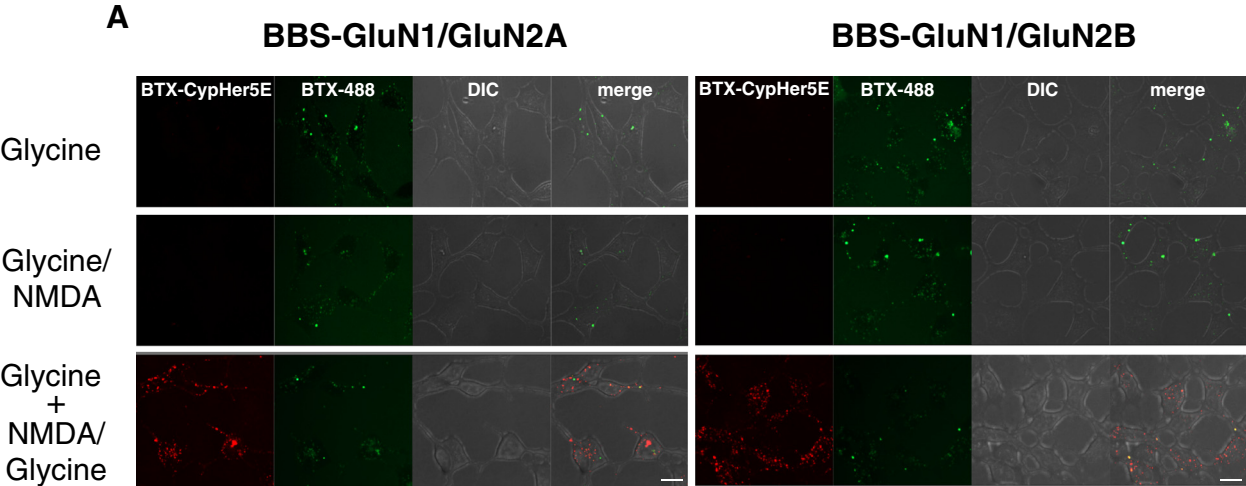

**B**

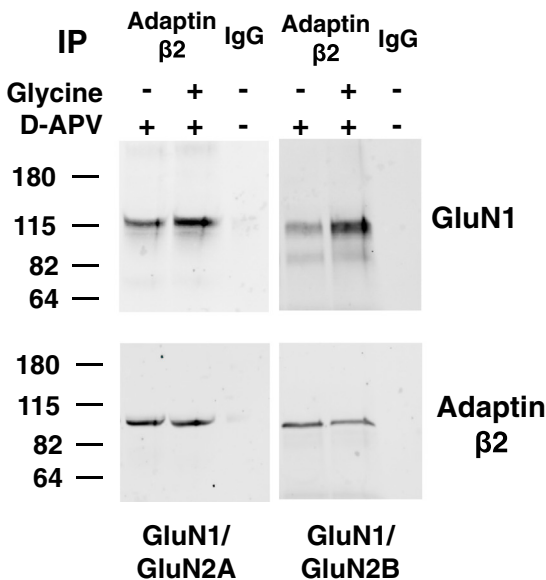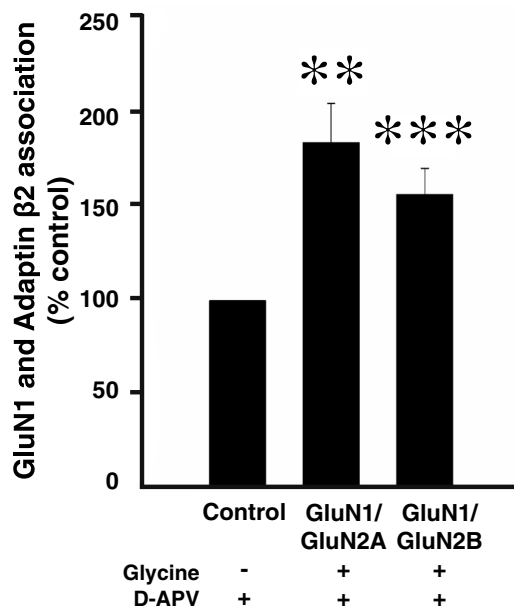

Supplement: MOESM3 [file 25657778]
